# Supplementary material for: Comparison of the gut microbiota of obese individuals from different geographic origins
Source: PubMed Central journal article supplement — New Microbes New Infect. 2018 Nov 22;27:40–7. doi: 10.1016/j.nmni.2018.11.005 (PMC6296163; doi:10.1016/j.nmni.2018.11.005), 2018-11-22
Supplement: mmc1.pdf [file mmc1.pdf]

**Running head: Microbiota of individuals with different origins**

**Comparison of the gut microbiota of obese individuals from different geographic origins**

Fig S1.

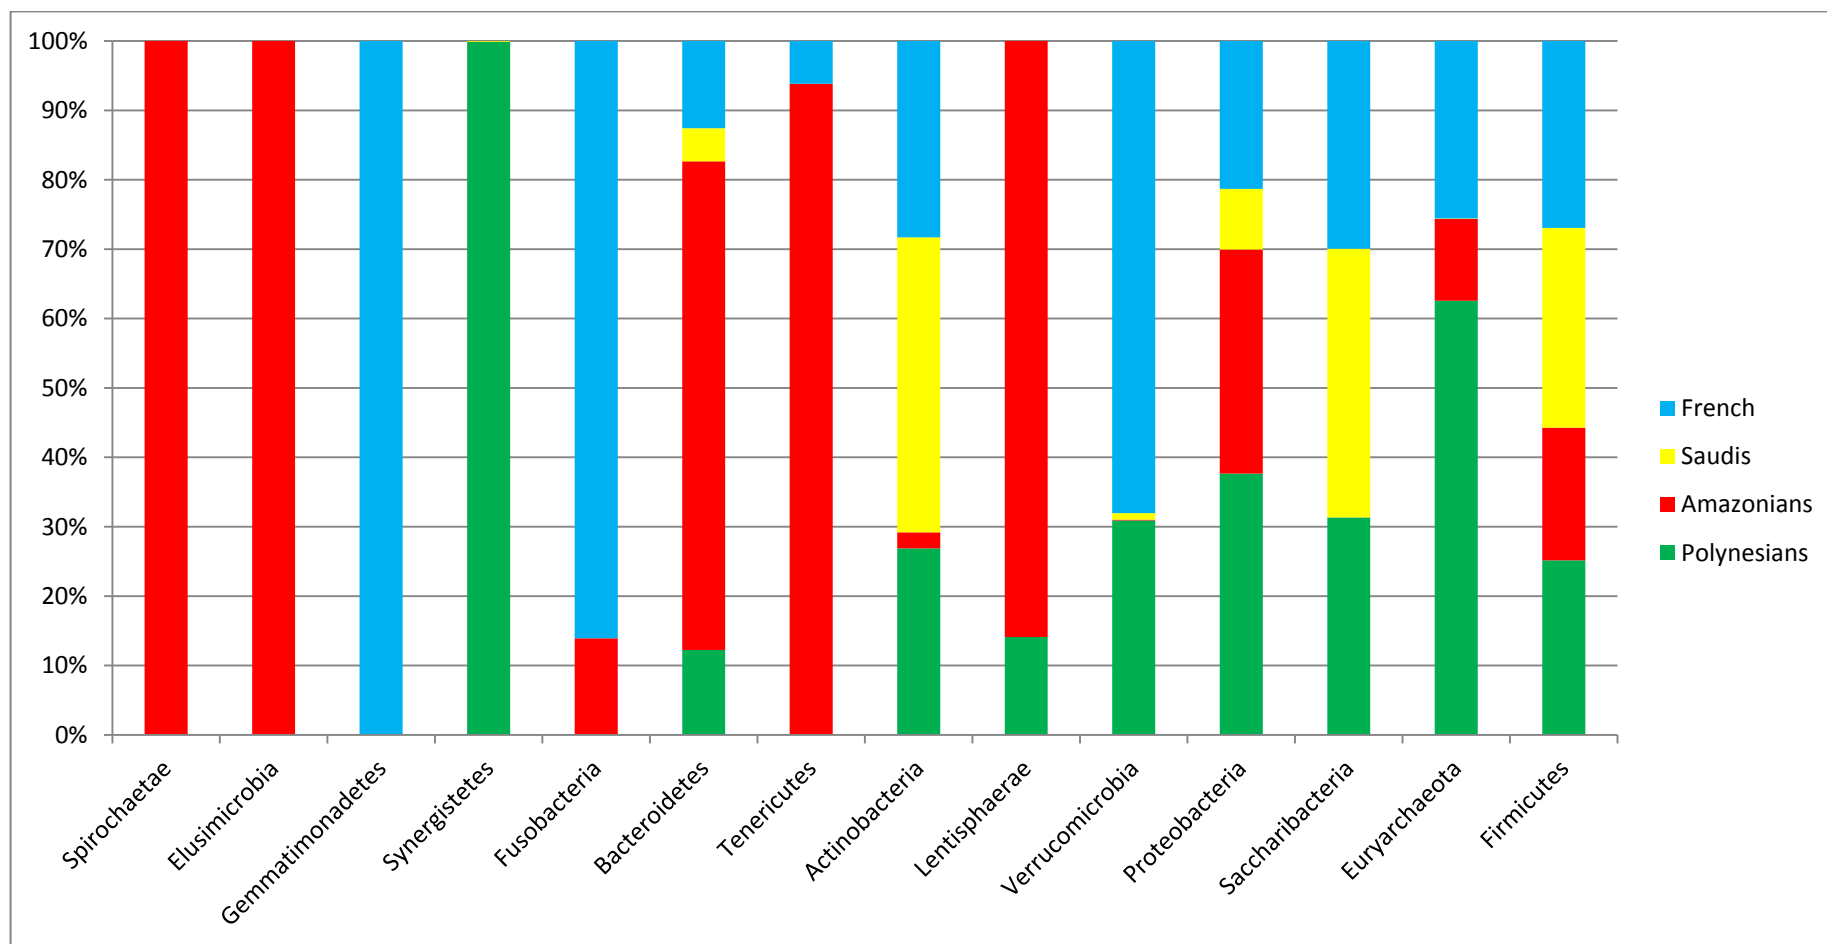

Fig S2.

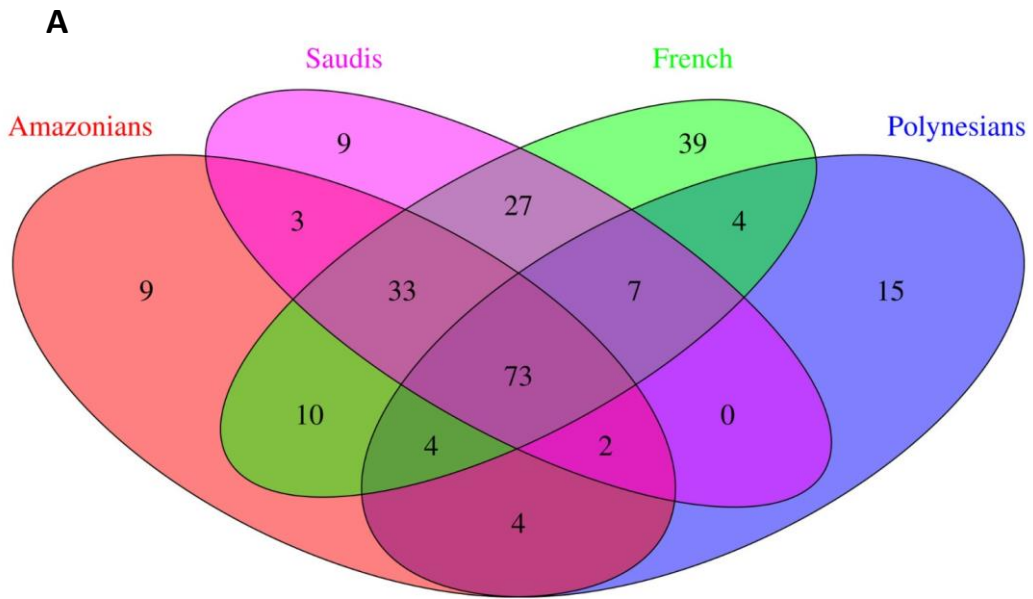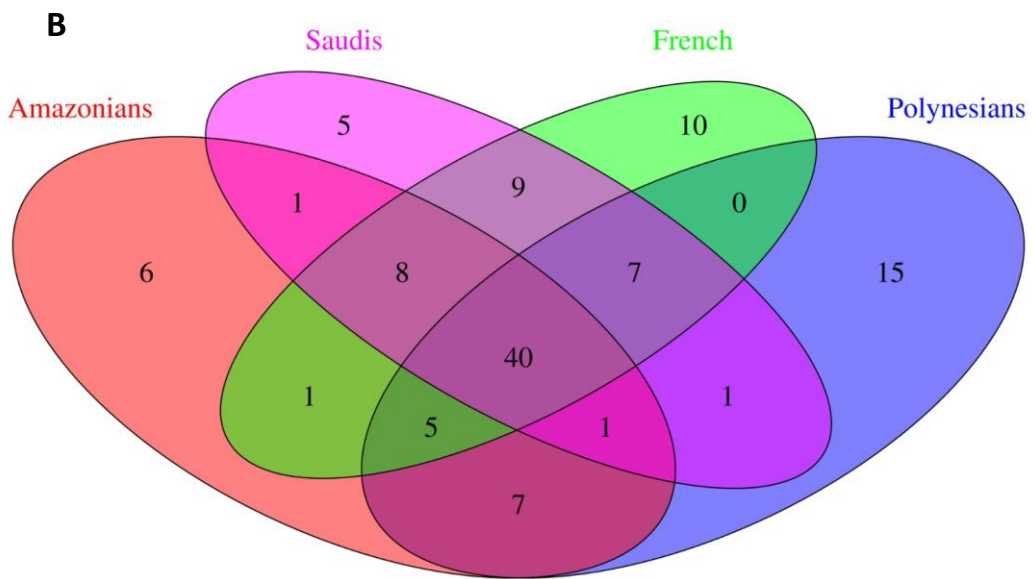

Fig S3.

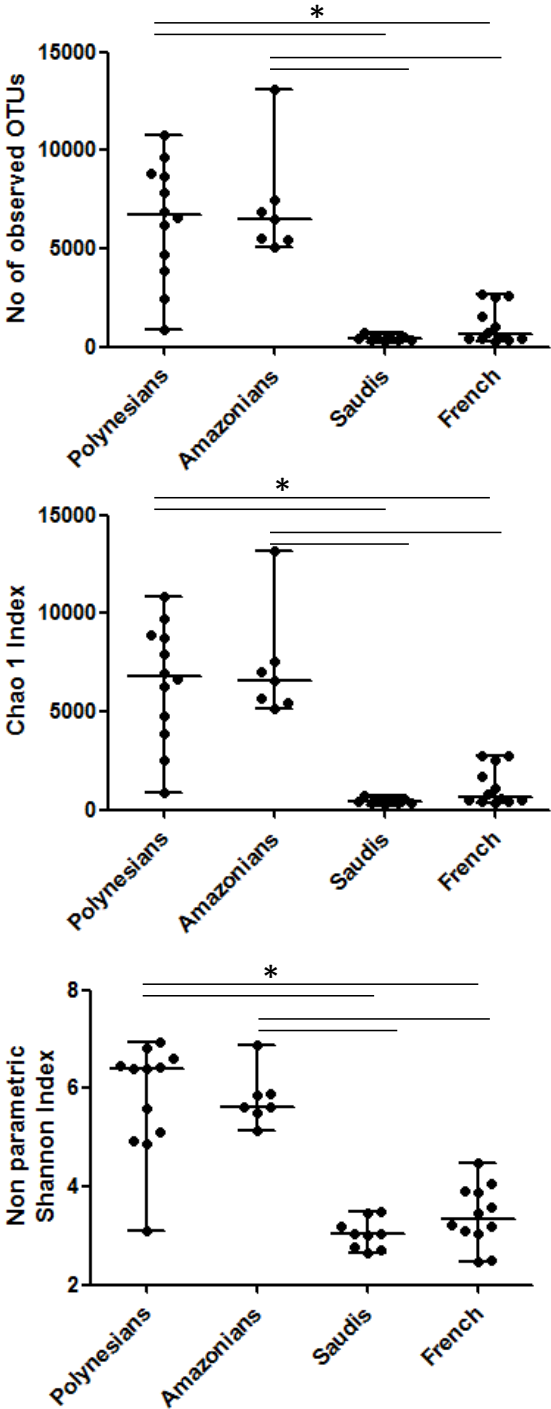

\*,  $p < 0.05$
